# Supplementary material for: Deep learning based sub-seasonal precipitation and streamflow forecasting over the source region of the Yangtze River
Source: Copernicus journal article supplement (doi:10.5194/hess-2024-212), 2024-07-29
Supplement: Supplementary file 1 [file hess-2024-212-supplement.pdf]

Supporting Information for

## **Deep learning based sub-seasonal precipitation and streamflow forecasting over the source region of the Yangtze River**

Ningpeng Dong<sup>1</sup>, Haoran Hao<sup>2,1</sup>, Mingxiang Yang<sup>1</sup>, Jianhui Wei<sup>3</sup>, Shiqin Xu<sup>4</sup>, Harald Kunstmann<sup>3,5,6</sup>

<sup>1</sup>State Key Laboratory of Simulation and Regulation of Water Cycle in River Basin, China Institute of Water Resources and Hydropower Research, Beijing, China

<sup>2</sup>State Key Laboratory of Hydraulic Engineering Intelligent Construction and Operation, Tianjin University, Tianjin 300072, China

<sup>3</sup>Institute of Meteorology and Climate Research (IMKIFU), Karlsruhe Institute of Technology, Campus Alpine, Garmisch-Partenkirchen, Germany

<sup>4</sup>Hydrology, Agriculture and Land Observation (HALO) Laboratory, King Abdullah University of Science and Technology, Thuwal, Saudi Arabia

<sup>5</sup>Institute of Geography, University of Augsburg, Augsburg, Germany

<sup>6</sup>Centre for Climate Resilience, University of Augsburg, Augsburg, Germany

*Correspondence to:* H. Hao (1020205041@tju.edu.cn) and M. Yang (yangmx@iwhr.com)

### **Contents of this file**

Figures S1

Tables S1 to S2

Text S1

### Text S1 Evaluation of temperature forecasts

By applying the delta bias correction method to the raw ECMWF forecasts, the mean absolute bias of temperature forecasts can be reduced by 0.15°C averaged over all lead times. In particular, delta improves the forecasts more remarkably (by 0.3°C) for lead times of less than 10 days, suggesting that delta method is able to effectively reduce the sub-seasonal ECMWF temperature forecasts.

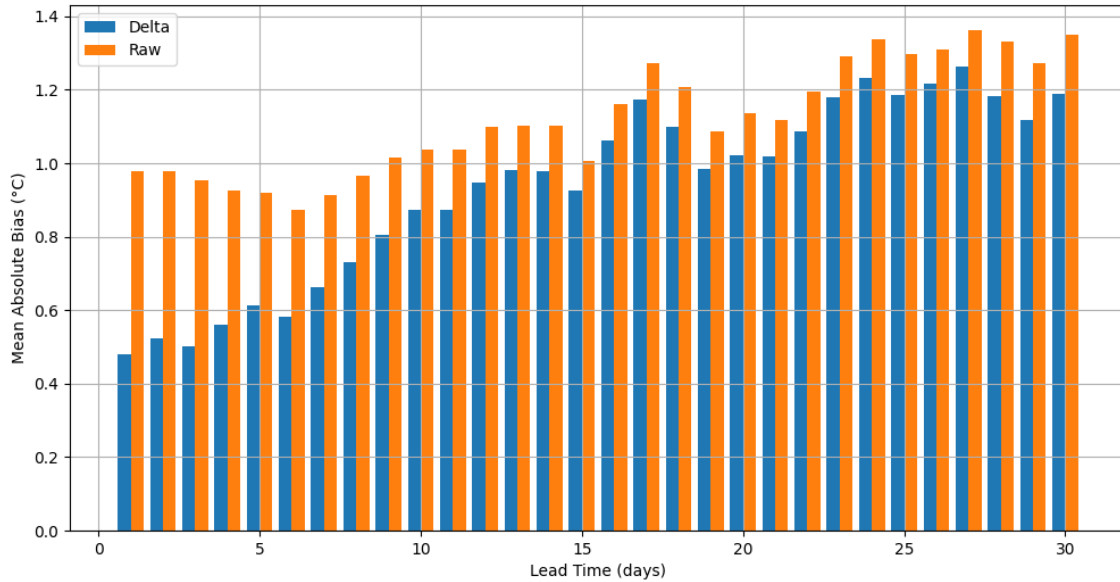

Figure S1. The mean absolute bias of temperature forecasts across lead times of 1-30 days.

Table S1. The hyperparameters in loss function of CNNs

| Lead time  | <i>a</i> | <i>b</i> |
|------------|----------|----------|
| 0~7 days   | 2        | 0.4      |
| 8~15 days  | 2        | 0.8      |
| 16~23 days | 2        | 1.5      |
| 24~30 days | 2        | 2        |

Table S2. The hyperparameters of hybrid hydrologic model

| Hyperparameters     | Value             | Descriptions                              |
|---------------------|-------------------|-------------------------------------------|
| Learning_rate       | Epoch 0-30: 1e-2  | Learning rate                             |
|                     | Epoch 31-40: 5e-3 |                                           |
|                     | Epoch 41-50: 1e-3 |                                           |
| Output_dropout      | 0.22              | Dropout applied to the output of the LSTM |
| Seq_length          | 177               | Length of input sequence                  |
| Hidden_size         | 21                | Number of neurons in the hidden layer     |
| initial_forget_bias | 3                 | Initial value of the forget gate bias     |
