# Supplementary material for: Deep learning based sub-seasonal precipitation and streamflow forecasting over the source region of the Yangtze River
Source: Copernicus journal article supplement (doi:10.5194/hess-2024-212), 2024-07-29
Supplement: Supplementary file [file hess-2024-212-AC1-supplement.pdf]

## **Response to Reviewer #1**

### **Major Comments:**

**Comment:**

**Reply:**

**Comment:**

**Reply:**

**Comment:**

**Reply:**

**Comment:**

**Reply:**

## References

*Sensing, 15*

---

*Remote*

*Journal of Hydrology, 610*

---

*Hydrology and Earth System Sciences, 19*

---

## Comment:

## Reply:

*improvements*

*improvements*

## References

**Comment:**

**Reply:**

**Minor Comments:**

**Comment:**

**Reply:**

**Comment:**

**Reply:**

**Comment:**

**Reply:**

**Comment:**

**Reply:**

**Comment:**

**Reply:**
